# Supplementary material for: Ab initio kinetics of the HOSO2 + 3O2 → SO3 + HO2 reaction
Source: Royal Society of Chemistry journal article supplement (doi:10.1039/c7cp07704a), 2018-01-01
Supplement: c7cp07704a1.pdf [file c7cp07704a1.pdf]

## Supplementary Information

### ***Ab initio* Kinetics of the $\text{HOSO}_2 + {}^3\text{O}_2 \rightarrow \text{SO}_3 + \text{HO}_2$ Reaction**

Tam V.-T. Mai,<sup>1,2</sup> Minh v. Duong,<sup>1</sup> Hieu T. Nguyen<sup>1</sup> and Lam K. Huynh<sup>3,\*</sup>

<sup>1</sup> Molecular Science and Nano-Materials Lab, Institute for Computational Science and Technology, SBI Building, Quang Trung Software City, Tan Chanh Hiep Ward, District 12, Ho Chi Minh City, Vietnam.

<sup>2</sup> University of Science, Vietnam National University – HCMC, 227 Nguyen Van Cu, Ward 4, District 5, Ho Chi Minh City, Vietnam.

<sup>3</sup> International University, Vietnam National University – HCMC, Quarter 6, Linh Trung Ward, Thu Duc District, Ho Chi Minh City, Vietnam.

\*Corresponding author.

## Contents

|                                                                                                                                                                                                                                                                                                        |    |
|--------------------------------------------------------------------------------------------------------------------------------------------------------------------------------------------------------------------------------------------------------------------------------------------------------|----|
| <b>Table S1:</b> The optimized geometries, electronic energies at 0 K ( $E_{elec}^{0K}$ ), zero-point energy (ZPE) corrections and harmonic wavenumbers of the species involved, calculated at W1U level of theory for the title reaction. ....                                                        | 3  |
| <b>Table S2:</b> T1 diagnostics for the species involved in $\text{HOSO}_2 + \text{O}_2$ reaction computed at CCSD(T)/cc-pVTZ with the B3LYP/cc-pVTZ+d geometries. ....                                                                                                                                | 5  |
| <b>Table S3:</b> High-pressure rate constants for the $\text{HOSO}_2 + \text{O}_2$ system calculated at W1U method <sup>[a]</sup> . ....                                                                                                                                                               | 5  |
| <b>Table S4:</b> Calculated the anharmonic and HIR factors for the addition step (via TS1). ....                                                                                                                                                                                                       | 6  |
| <b>Table S5:</b> Parameters obtained from the modified Arrhenius expression <sup>[a]</sup> of the calculated values for the pressure-dependent rate coefficients over the temperature range of 200 – 1000 K for $\text{HOSO}_2 + \text{O}_2 \rightarrow \text{SO}_3 + \text{HO}_2$ reaction. ....      | 6  |
| <b>Table S6:</b> Rate constants and uncertainty for $\text{HOSO}_2 + \text{O}_2 \rightarrow$ products at $T = 200 - 1000$ K and $P = 10$ torr, using the stochastic approach with $10^8$ trials. ....                                                                                                  | 7  |
| <b>Table S7:</b> Rate constants and uncertainty for $\text{HOSO}_4$ (adduct) $\rightarrow$ products at $T = 200 - 1000$ K and $P = 10$ torr, using the stochastic approach with $10^8$ trials. ....                                                                                                    | 7  |
| <b>Table S8:</b> Rate constants and uncertainty for post-complex $\rightarrow$ products at $T = 200 - 1000$ K and $P = 10$ torr, using the stochastic approach with $10^8$ trials. ....                                                                                                                | 8  |
| <b>Table S9:</b> Detailed kinetic submechanism in NASA format for the reaction $\text{HOSO}_2 + \text{O}_2$ . ....                                                                                                                                                                                     | 8  |
| <b>Figure S1:</b> Hindrance potentials for $\text{HOSO}_2$ (a), $\text{HOSO}_4$ (b), TS1 (c), TS_abs (d) and Post-complex (e) calculated at B3LYP/aug-cc-pVDZ level of theory. ....                                                                                                                    | 12 |
| <b>Figure S2:</b> Calculated rate constants as a function of temperature at $P = 10$ torr for the $\text{HOSO}_4 \rightarrow$ products (a) and post-complex $\rightarrow$ products (b) reactions. ....                                                                                                 | 13 |
| <b>Figure S3:</b> Comparison of the calculated rate constants between the deterministic (solid line) and stochastic (dashed line) models as a function of temperature ( $T = 200 - 1000$ K) at $P = 10$ torr for the $\text{HOSO}_2 + \text{O}_2 \rightarrow \text{SO}_3 + \text{HO}_2$ reaction. .... | 14 |
| <b>References</b> .....                                                                                                                                                                                                                                                                                | 15 |

**Table S1:** The optimized geometries, electronic energies at 0 K ( $E_{elec}^{0K}$ ), zero-point energy (ZPE) corrections and harmonic wavenumbers of the species involved, calculated at WIU level of theory for the title reaction.

| Species                                                  | Cartesian coordinate<br>(Å) |              |              | $E_{elec}^{0K}$<br>(Hartree) | ZPE<br>(Hartree) | Unscaled vibrational frequencies (cm <sup>-1</sup> ) [a] |                                                                                                                                                                                                                                                                              |           |            |
|----------------------------------------------------------|-----------------------------|--------------|--------------|------------------------------|------------------|----------------------------------------------------------|------------------------------------------------------------------------------------------------------------------------------------------------------------------------------------------------------------------------------------------------------------------------------|-----------|------------|
| <b>HOSO<sub>2</sub></b><br>(C <sub>1</sub> )             | S                           | 0.133973000  | 0.069399000  | 0.252505000                  | -625.530878      | 0.022084                                                 | <b>281</b>                                                                                                                                                                                                                                                                   | 419       | 429        |
|                                                          | O                           | -1.169888000 | -0.838173000 | -0.109904000                 |                  |                                                          | 530                                                                                                                                                                                                                                                                          | 751       | 1106       |
|                                                          | H                           | -1.948695000 | -0.260162000 | -0.113307000                 |                  |                                                          | 1114                                                                                                                                                                                                                                                                         | 1318      | 3744       |
|                                                          | O                           | 1.271870000  | -0.693791000 | -0.194507000                 |                  |                                                          | [N/A; N/A; N/A; 538; 787; 1103; N/A; 1312; 3476] <sup>1-3</sup>                                                                                                                                                                                                              |           |            |
|                                                          | O                           | -0.126342000 | 1.425685000  | -0.186435000                 |                  |                                                          | (278; 420; 429; 531; 759; 1112; 1147; 1317; 3865) <sup>4</sup><br>(284; 418; 428; 526; 745; 1009; 1112; 1309; 3734) <sup>5</sup><br>(257; 396; 411; 521; 725; 1045; 1129; 1317; 3582) <sup>6,[b]</sup><br>(282; 418; 431; 545; 783; 1103; 1147; 1378; 3600) <sup>7,[b]</sup> |           |            |
| <b>O<sub>2</sub></b> (triplet)<br>(C <sub>∞h</sub> )     | O                           | 0.000000000  | 0.000000000  | 0.602922000                  | -150.414422      | 0.003711                                                 | 1629                                                                                                                                                                                                                                                                         |           |            |
|                                                          | O                           | 0.000000000  | 0.000000000  | -0.602922000                 |                  |                                                          | [1580] <sup>8</sup> ; (1682) <sup>4</sup> ; (1549) <sup>6,[b]</sup>                                                                                                                                                                                                          |           |            |
| <b>HOSO<sub>4</sub></b><br>(Adduct)<br>(C <sub>1</sub> ) | S                           | 0.468967000  | -0.038648000 | 0.085706000                  | -775.975287      | 0.030035                                                 | <b>101</b>                                                                                                                                                                                                                                                                   | 216       | <b>327</b> |
|                                                          | O                           | 0.316278000  | 1.188759000  | -0.890097000                 |                  |                                                          | 346                                                                                                                                                                                                                                                                          | 387       | 458        |
|                                                          | H                           | -0.238908000 | 1.869123000  | -0.475917000                 |                  |                                                          | 503                                                                                                                                                                                                                                                                          | 574       | 656        |
|                                                          | O                           | 0.470797000  | 0.400500000  | 1.435544000                  |                  |                                                          | 866                                                                                                                                                                                                                                                                          | 1133      | 1155       |
|                                                          | O                           | 1.404683000  | -0.935127000 | -0.476815000                 |                  |                                                          | 1238                                                                                                                                                                                                                                                                         | 1489      | 3734       |
|                                                          | O                           | -2.050653000 | 0.009226000  | 0.008578000                  |                  |                                                          | (95; 203; 313; 332; 363; 440; 484; 560; 637; 842;<br>1138; 1157; 1207; 1453; 3730) <sup>4</sup>                                                                                                                                                                              |           |            |
|                                                          | O                           | -1.049175000 | -0.819702000 | -0.189132000                 |                  |                                                          | (111; 226; 326; 348; 398; 453; 496; 561; 657; 839;<br>1121; 1175; 1211; 1467; 3768) <sup>9</sup><br>(99; 216; 315; 343; 372; 447; 495; 563; 655; 832;<br>1070; 1153; 1204; 1458; 3567) <sup>6,[b]</sup>                                                                      |           |            |
| <b>Post-complex</b><br>(C <sub>s</sub> )                 | S                           | 0.674689000  | 0.094604000  | 0.000004000                  | -775.969172      | 0.030106                                                 | <b>93</b>                                                                                                                                                                                                                                                                    | 181       | 222        |
|                                                          | O                           | 0.016931000  | 1.384678000  | 0.000075000                  |                  |                                                          | 260                                                                                                                                                                                                                                                                          | 418       | 526        |
|                                                          | H                           | -1.635843000 | 0.901172000  | 0.000038000                  |                  |                                                          | 534                                                                                                                                                                                                                                                                          | 547       | <b>742</b> |
|                                                          | O                           | 1.144782000  | -0.426639000 | 1.238356000                  |                  |                                                          | 1051                                                                                                                                                                                                                                                                         | 1228      | 1329       |
|                                                          | O                           | 1.144766000  | -0.426508000 | -1.238409000                 |                  |                                                          | 1420                                                                                                                                                                                                                                                                         | 1546      | 3116       |
|                                                          | O                           | -2.179831000 | 0.054889000  | 0.000001000                  |                  |                                                          | (93; 179; 213; 256; 284; 411; 511; 520; 532; 743;<br>1023; 1229; 1300; 1389; 1548; 3100) <sup>4</sup>                                                                                                                                                                        |           |            |
|                                                          | O                           | -1.271545000 | -0.888274000 | -0.000036000                 |                  |                                                          | (123; 273; 318; 474; 504; 605; 640; 715; 1025; 1041;<br>1077; 1265; 1402; 1885; >10 <sup>4</sup> ) <sup>9</sup>                                                                                                                                                              |           |            |
| <b>TS1</b>                                               | S                           | -0.555294000 | -0.118998000 | 0.094636000                  | -775.945567      | 0.027206                                                 | -167                                                                                                                                                                                                                                                                         | <b>57</b> | 87         |

| Species                                     | Cartesian coordinate<br>(Å) |              |              | $E_{elec}^{0K}$<br>(Hartree) | ZPE<br>(Hartree) | Unscaled vibrational frequencies (cm <sup>-1</sup> ) [a] |                                                                                                 |            |      |
|---------------------------------------------|-----------------------------|--------------|--------------|------------------------------|------------------|----------------------------------------------------------|-------------------------------------------------------------------------------------------------|------------|------|
| (C <sub>1</sub> )                           | O                           | -1.085630000 | 0.791732000  | -1.133674000                 |                  |                                                          | 106                                                                                             | <b>293</b> | 352  |
|                                             | H                           | -1.496348000 | 1.590801000  | -0.768235000                 |                  |                                                          | 431                                                                                             | 441        | 542  |
|                                             | O                           | -0.378227000 | -1.439734000 | -0.433834000                 |                  |                                                          | 769                                                                                             | 1122       | 1141 |
|                                             | O                           | -1.347839000 | 0.177850000  | 1.262221000                  |                  |                                                          | 1375                                                                                            | 1482       | 3744 |
|                                             | O                           | 2.456312000  | -0.151613000 | -0.102914000                 |                  |                                                          |                                                                                                 |            |      |
|                                             | O                           | 1.653014000  | 0.660911000  | 0.314957000                  |                  |                                                          |                                                                                                 |            |      |
| <b>TS2</b><br>(C <sub>s</sub> )             | S                           | -0.579924000 | 0.000006000  | 0.055979000                  | -775.964104      | 0.026611                                                 | -920                                                                                            | 133        | 276  |
|                                             | O                           | 0.159804000  | 0.000116000  | 1.359026000                  |                  |                                                          | 296                                                                                             | 485        | 511  |
|                                             | H                           | 1.298440000  | 0.000090000  | 0.955386000                  |                  |                                                          | 598                                                                                             | 624        | 762  |
|                                             | O                           | -1.154483000 | 1.242731000  | -0.325045000                 |                  |                                                          | 1055                                                                                            | 1075       | 1237 |
|                                             | O                           | -1.154506000 | -1.242775000 | -0.324827000                 |                  |                                                          | 1303                                                                                            | 1437       | 1888 |
|                                             | O                           | 2.045870000  | 0.000000000  | -0.023483000                 |                  |                                                          | (-913; 132; 264; 284; 472; 497; 595; 609; 751; 1032; 1077; 1240; 1277; 1404; 1884) <sup>4</sup> |            |      |
|                                             | O                           | 1.100857000  | -0.000095000 | -0.917052000                 |                  |                                                          | (-438; 114; 272; 340; 474; 480; 540; 621; 879; 949; 1220; 1330; 1426; 1480; 2248) <sup>9</sup>  |            |      |
| <b>TS_abs</b><br>(C <sub>1</sub> )          | S                           | 1.178164000  | 0.052368000  | 0.183279000                  | -775.896478      | 0.022470                                                 | -1706                                                                                           | <b>27</b>  | 38   |
|                                             | O                           | -0.132024000 | -0.409442000 | 0.768446000                  |                  |                                                          | 109                                                                                             | 196        | 466  |
|                                             | H                           | -1.168108000 | -0.442278000 | 0.175216000                  |                  |                                                          | 480                                                                                             | 544        | 578  |
|                                             | O                           | 1.941549000  | -0.962197000 | -0.493415000                 |                  |                                                          | 1017                                                                                            | 1097       | 1206 |
|                                             | O                           | 1.201437000  | 1.424937000  | -0.248755000                 |                  |                                                          | 1335                                                                                            | 1343       | 1427 |
|                                             | O                           | -2.986827000 | 0.419253000  | -0.033647000                 |                  |                                                          |                                                                                                 |            |      |
|                                             | O                           | -2.234451000 | -0.522002000 | -0.381089000                 |                  |                                                          |                                                                                                 |            |      |
| <b>SO<sub>3</sub></b><br>(D <sub>3h</sub> ) | O                           | 0.000000000  | 1.426051000  | -0.000118000                 | -624.947038      | 0.012378                                                 | 495                                                                                             | 527        | 527  |
|                                             | O                           | 1.234997000  | -0.713026000 | -0.000118000                 |                  |                                                          | 1076                                                                                            | 1404       | 1404 |
|                                             | S                           | 0.000000000  | 0.000000000  | 0.000177000                  |                  |                                                          | [498; 530; 530; 1065; 1391; 1391] <sup>10</sup>                                                 |            |      |
|                                             | O                           | -1.234997000 | -0.713026000 | -0.000118000                 |                  |                                                          | (477; 512; 512; 1050; 1374; 1375) <sup>4</sup>                                                  |            |      |
| <b>HO<sub>2</sub></b><br>(C <sub>1</sub> )  | O                           | 0.055357000  | 0.718609000  | 0.000000000                  | -151.001595      | 0.014117                                                 | 1161                                                                                            | 1432       | 3603 |
|                                             | O                           | 0.055357000  | -0.610398000 | 0.000000000                  |                  |                                                          | [1098; 1392; 3436] <sup>11</sup> ; (1160; 1432; 3602) <sup>4</sup>                              |            |      |
|                                             | H                           | -0.885712000 | -0.865689000 | 0.000000000                  |                  |                                                          |                                                                                                 |            |      |

[a] Frequency modes in *italic* and **bold** corresponds to the internal rotations. Frequencies in square parentheses (“[ ]”) are taken from experimental studies. [b] Anharmonic values.

**Table S2:** T1 diagnostics for the species involved in HOSO<sub>2</sub> + O<sub>2</sub> reaction computed at CCSD(T)/cc-pVTZ with the B3LYP/cc-pVTZ+d geometries.

| No. | Species                     | T1 diagnostics |
|-----|-----------------------------|----------------|
| 1   | HOSO <sub>2</sub>           | 0.02006765     |
| 2   | <sup>3</sup> O <sub>2</sub> | 0.01550560     |
| 3   | SO <sub>3</sub>             | 0.01807977     |
| 4   | HO <sub>2</sub>             | 0.02843197     |
| 5   | HOSO <sub>4</sub> (adduct)  | 0.02387292     |
| 6   | Post-complex                | 0.02523502     |
| 7   | TS1                         | 0.02756714     |
| 8   | TS2                         | 0.02179923     |
| 9   | TS_abs                      | 0.04249207     |

The T1 values of less than 0.02 and 0.04 (in some cases < 0.045<sup>12</sup> may be acceptable) for closed shell and radical species, respectively, suggest the non-dynamic correlation energy is small<sup>13-17</sup>, thus there is no need to consider high-order methods for the title system.

**Table S3:** High-pressure rate constants for the HOSO<sub>2</sub> + O<sub>2</sub> system calculated at W1U method<sup>[a]</sup>.

| No. | Reaction                                                                              | $k(T) = A \times T^n \times \exp(-E_a/RT)$ |       |                    | $k(T)$ at 298 K <sup>[b]</sup>                               |
|-----|---------------------------------------------------------------------------------------|--------------------------------------------|-------|--------------------|--------------------------------------------------------------|
|     |                                                                                       | $A$ <sup>[b]</sup>                         | $n$   | $E_a/R$ (K)        |                                                              |
| 1   | HOSO <sub>2</sub> + O <sub>2</sub> → HOSO <sub>4</sub><br>(reverse reaction)          | $5.62 \times 10^{-18}$                     | 2.05  | $5.17 \times 10^1$ | $5.5 \times 10^{-13}$ ( $4.1 \times 10^{-13}$ ) <sup>4</sup> |
|     |                                                                                       | $4.29 \times 10^{14}$                      | 0.20  | $8.71 \times 10^3$ | $2.7 \times 10^2$ ( $3.1 \times 10^1$ ) <sup>4</sup>         |
| 2   | HOSO <sub>4</sub> → post-complex<br>(reverse reaction)                                | $6.87 \times 10^{11}$                      | -0.08 | $2.05 \times 10^3$ | $4.7 \times 10^8$                                            |
|     |                                                                                       | $2.08 \times 10^{12}$                      | -0.03 | $3.31 \times 10^3$ | $5.7 \times 10^{11}$                                         |
| 3   | SO <sub>3</sub> + HO <sub>2</sub> → post-complex <sup>[c]</sup><br>(reverse reaction) | $5.62 \times 10^{-18}$                     | 2.05  | $5.17 \times 10^1$ | $5.5 \times 10^{-13}$                                        |
|     |                                                                                       | $1.83 \times 10^{17}$                      | -0.65 | $6.34 \times 10^3$ | $2.5 \times 10^6$                                            |

<sup>[a]</sup> Rate constants are valid for 200–1000 K. <sup>[b]</sup> Units of [s<sup>-1</sup>] for first-order reactions and [cm<sup>3</sup> molecule<sup>-1</sup> s<sup>-1</sup>] for second-order reactions. This work calculated at composite W1U method including Eckart tunneling, HIR treatments and symmetry reactions. <sup>[c]</sup> Assume equal to HOSO<sub>2</sub> + O<sub>2</sub> → HOSO<sub>4</sub> reaction (see main text).

**Table S4:** Calculated the anharmonic and HIR factors for the addition step (via TS1).

| T (K) | anharm/harm | hir factor |
|-------|-------------|------------|
| 200   | 1.1         | 18.6       |
| 250   | 1.1         | 17.9       |
| 298   | 1.1         | 17.5       |
| 300   | 1.1         | 17.5       |
| 350   | 1.1         | 17.1       |
| 400   | 1.1         | 16.7       |
| 450   | 1.1         | 16.4       |
| 500   | 1.1         | 16.1       |
| 550   | 1.1         | 15.8       |
| 600   | 1.1         | 15.5       |
| 650   | 1.1         | 15.2       |
| 700   | 1.1         | 15.0       |
| 750   | 1.1         | 14.7       |
| 800   | 1.1         | 14.5       |
| 850   | 1.1         | 14.3       |
| 900   | 1.1         | 14.0       |
| 950   | 1.1         | 13.8       |
| 1000  | 1.1         | 13.6       |

**Table S5:** Parameters obtained from the modified Arrhenius expression<sup>[a]</sup> of the calculated values for the pressure-dependent rate coefficients over the temperature range of 200 – 1000 K for  $\text{HOSO}_2 + \text{O}_2 \rightarrow \text{SO}_3 + \text{HO}_2$  reaction.

| <i>P</i> (torr) | <i>A</i> (cm <sup>3</sup> /molecule/s) | <i>n</i> | <i>E<sub>a</sub>/R</i> (K) |
|-----------------|----------------------------------------|----------|----------------------------|
| 10              | $2.59 \times 10^{-7}$                  | -1.75    | $9.72 \times 10^2$         |
| 50              | $5.51 \times 10^{-7}$                  | -1.85    | $1.03 \times 10^3$         |
| 100             | $1.17 \times 10^{-6}$                  | -1.95    | $1.09 \times 10^3$         |
| 300             | $6.77 \times 10^{-6}$                  | -2.18    | $1.25 \times 10^3$         |
| 760             | $5.82 \times 10^{-5}$                  | -2.47    | $1.44 \times 10^3$         |

**Table S6:** Rate constants and uncertainty for  $\text{HOSO}_2 + \text{O}_2 \rightarrow \text{products}$  at  $T = 200 - 1000$  K and  $P = 10$  torr, using the stochastic approach with  $10^8$  trials.

| P [torr] | T [K] | $\text{HOSO}_4$ (adduct)<br>[cm <sup>3</sup> /molecule/s] | unc. (%) | Post-complex<br>[cm <sup>3</sup> /molecule/s] | unc. (%) | $\text{SO}_3 + \text{HO}_2$<br>[cm <sup>3</sup> /molecule/s] | unc. (%) |
|----------|-------|-----------------------------------------------------------|----------|-----------------------------------------------|----------|--------------------------------------------------------------|----------|
| 1.00E+01 | 200   | 3.90E-15                                                  | 1.7E-04  | 3.41E-18                                      | 2.0E-01  | 1.97E-13                                                     | 3.4E-06  |
| 1.00E+01 | 300   | 1.24E-15                                                  | 1.4E-03  | 2.65E-18                                      | 6.3E-01  | 4.23E-13                                                     | 4.0E-06  |
| 1.00E+01 | 400   | 3.84E-16                                                  | 8.2E-03  | 2.46E-18                                      | 1.3E+00  | 6.18E-13                                                     | 5.1E-06  |
| 1.00E+01 | 500   | 5.08E-17                                                  | 1.0E-01  | 7.66E-19                                      | 6.7E+00  | 7.27E-13                                                     | 7.0E-06  |
| 1.00E+01 | 600   | 3.02E-18                                                  | 2.5E+00  | 7.55E-20                                      | 1.0E+02  | 7.49E-13                                                     | 1.0E-05  |
| 1.00E+01 | 700   | 2.10E-19                                                  | 5.0E+01  | 1.05E-19                                      | 1.0E+02  | 7.14E-13                                                     | 1.5E-05  |
| 1.00E+01 | 800   | 1.39E-19                                                  | 1.0E+02  | 1.39E-19                                      | 1.0E+02  | 6.52E-13                                                     | 2.1E-05  |
| 1.00E+01 | 900   | 1.78E-19                                                  | 1.0E+02  | 1.78E-19                                      | 1.0E+02  | 5.82E-13                                                     | 3.1E-05  |
| 1.00E+01 | 1000  | 2.23E-19                                                  | 1.0E+02  | 2.22E-19                                      | 1.0E+02  | 5.17E-13                                                     | 4.3E-05  |

**Table S7:** Rate constants and uncertainty for  $\text{HOSO}_4$  (adduct)  $\rightarrow \text{products}$  at  $T = 200 - 1000$  K and  $P = 10$  torr, using the stochastic approach with  $10^8$  trials.

| P [torr] | T [K] | $\text{HOSO}_2 + \text{O}_2$<br>[1/s] | unc. (%) | Post-complex<br>[1/s] | unc. (%) | $\text{SO}_3 + \text{HO}_2$<br>[1/s] | unc. (%) |
|----------|-------|---------------------------------------|----------|-----------------------|----------|--------------------------------------|----------|
| 1.00E+01 | 200   | 1.32E-02                              | 1.0E+02  | 4.64E+01              | 2.8E-02  | 1.32E-02                             | 1.0E+02  |
| 1.00E+01 | 300   | 1.30E-01                              | 1.0E+02  | 1.53E+02              | 8.5E-02  | 1.30E-01                             | 1.0E+02  |
| 1.00E+01 | 400   | 3.75E-01                              | 1.0E+02  | 1.67E+02              | 2.2E-01  | 3.75E-01                             | 1.0E+02  |
| 1.00E+01 | 500   | 8.14E-01                              | 1.0E+02  | 1.03E+02              | 7.9E-01  | 8.14E-01                             | 1.0E+02  |
| 1.00E+01 | 600   | 8.28E+00                              | 2.0E+01  | 5.79E+01              | 2.9E+00  | 2.48E+01                             | 6.7E+00  |
| 1.00E+01 | 700   | 1.95E+02                              | 1.8E+00  | 3.13E+01              | 1.1E+01  | 1.19E+03                             | 2.9E-01  |
| 1.00E+01 | 800   | 5.75E+03                              | 1.4E-01  | 5.74E+01              | 1.4E+01  | 2.00E+04                             | 4.1E-02  |
| 1.00E+01 | 900   | 1.10E+05                              | 2.2E-02  | 9.78E+01              | 2.5E+01  | 3.13E+05                             | 7.8E-03  |
| 1.00E+01 | 1000  | 1.56E+06                              | 4.6E-03  | 7.18E+01              | 1.0E+02  | 3.94E+06                             | 2.1E-03  |

**Table S8:** Rate constants and uncertainty for post-complex  $\rightarrow$  products at  $T = 200 - 1000$  K and  $P = 10$  torr, using the stochastic approach with  $10^8$  trials.

| P [torr] | T [K] | HOSO <sub>4</sub><br>[1/s] | unc. (%) | HOSO <sub>2</sub> + O <sub>2</sub><br>[1/s] | unc. (%) | SO <sub>3</sub> + HO <sub>2</sub><br>[1/s] | unc. (%) |
|----------|-------|----------------------------|----------|---------------------------------------------|----------|--------------------------------------------|----------|
| 1.00E+01 | 200   | 2.41E+06                   | 2.4E-05  | 5.87E-01                                    | 1.0E+02  | 5.87E-01                                   | 1.0E+02  |
| 1.00E+01 | 300   | 6.85E+05                   | 1.7E-04  | 1.16E+00                                    | 1.0E+02  | 1.16E+00                                   | 1.0E+02  |
| 1.00E+01 | 400   | 1.90E+05                   | 1.5E-03  | 2.84E+00                                    | 1.0E+02  | 2.84E+00                                   | 1.0E+02  |
| 1.00E+01 | 500   | 6.17E+04                   | 1.0E-02  | 1.24E+01                                    | 5.0E+01  | 5.60E+01                                   | 1.1E+01  |
| 1.00E+01 | 600   | 1.59E+04                   | 6.9E-02  | 4.41E+02                                    | 2.5E+00  | 2.87E+03                                   | 3.8E-01  |
| 1.00E+01 | 700   | 6.37E+03                   | 2.8E-01  | 1.05E+04                                    | 1.7E-01  | 5.98E+04                                   | 3.0E-02  |
| 1.00E+01 | 800   | 4.39E+03                   | 6.4E-01  | 1.29E+05                                    | 2.2E-02  | 6.39E+05                                   | 4.4E-03  |
| 1.00E+01 | 900   | 2.24E+03                   | 2.0E+00  | 1.03E+06                                    | 4.2E-03  | 4.32E+06                                   | 1.0E-03  |
| 1.00E+01 | 1000  | 1.95E+03                   | 3.4E+00  | 5.44E+06                                    | 1.2E-03  | 2.07E+07                                   | 3.3E-04  |

**Table S9:** Detailed kinetic submechanism in NASA format for the reaction HOSO<sub>2</sub> + O<sub>2</sub>.

```

THERMO
300.000 2500.000 1500.000
o2 O 2 G 300.000 2500.000 1500.000 1
8.43297122E+000-1.62395209E-0021.32352834E-005-4.71695080E-0096.20833224E-013 2
-2.89317271E+003-3.73564980E+0011.10448200E+000-7.85406683E-005-1.05590985E-007 3
2.92270364E-010-1.32453260E-013-2.62273670E+0022.32775248E+000 4
hoso2 S 1O 3H 1 G 300.000 2500.000 1500.000 1
-2.84981961E+0017.11789201E-002-5.92051570E-0052.14614257E-008-2.86363137E-012 2
-1.93945190E+0021.83337614E+0022.73367116E+0003.15437893E-003-8.04459276E-006 3
7.57453027E-009-2.36932116E-012-1.12558918E+0041.44025696E+001 4
hoso4 S 1O 5H 1 G 300.000 2500.000 1500.000 1
-6.16289220E+0001.08949836E-002-2.25545391E-008-2.96251786E-0097.81310105E-013 2
-7.18873210E+0038.49581414E+0012.64453600E+0001.17431701E-002-2.38431053E-005 3
1.88976548E-008-5.17693417E-012-1.32396431E+0042.89779628E+001 4
post-complex S 1O 5H 1 G 300.000 2500.000 1500.000 1
-1.07463499E+0022.17183010E-001-1.52316012E-0044.56431544E-008-4.91647256E-012 2
3.17394791E+0046.40074745E+0022.93138928E+0008.96400425E-003-1.66976089E-005 3
1.27897972E-008-3.37950936E-012-1.28845067E+0042.75358825E+001 4

```



|                     |                  |                  |                  |                  |   |         |          |          |   |
|---------------------|------------------|------------------|------------------|------------------|---|---------|----------|----------|---|
| <b>ts1</b>          | S                | 1O               | 5H               | 1                | G | 300.000 | 2500.000 | 1500.000 | 1 |
| 3.72902375E+002     | -7.04332098E-001 | 4.97689114E-004  | -1.54432881E-007 | 1.78162849E-011  | 2 |         |          |          |   |
| -1.63829172E+005    | -2.02775883E+003 | 8.43764394E+000  | -2.61464079E-002 | 5.59805842E-005  | 3 |         |          |          |   |
| -4.93910583E-008    | 1.51874685E-011  | -1.19514957E+004 | 2.56413807E+000  |                  | 4 |         |          |          |   |
| <b>ts2</b>          | S                | 1O               | 5H               | 1                | G | 300.000 | 2500.000 | 1500.000 | 1 |
| -2.61134980E+002    | 5.62006312E-001  | -4.40597720E-004 | 1.51419450E-007  | -1.92538876E-011 | 2 |         |          |          |   |
| 8.64209255E+004     | 1.47223045E+003  | 5.20507508E+000  | -6.51301433E-003 | 1.49999148E-005  | 3 |         |          |          |   |
| -1.34163479E-008    | 4.08760422E-012  | -1.29544932E+004 | 2.05068066E+001  |                  | 4 |         |          |          |   |
| <b>so3</b>          | O                | 3S               | 1                |                  | G | 300.000 | 2500.000 | 1500.000 | 1 |
| 1.47773814E+001     | -3.29997788E-002 | 3.08079685E-005  | -1.21912159E-008 | 1.74697537E-012  | 2 |         |          |          |   |
| -1.50793980E+004    | -5.35975855E+001 | 2.92825781E+000  | -3.60009684E-003 | 7.33046251E-006  | 3 |         |          |          |   |
| -5.66441893E-009    | 1.45348661E-012  | -1.17851718E+004 | 8.39774883E+000  |                  | 4 |         |          |          |   |
| <b>ho2</b>          | O                | 2H               | 1                |                  | G | 300.000 | 2500.000 | 1500.000 | 1 |
| -5.36509260E+001    | 1.13758079E-001  | -8.72004719E-005 | 2.95346987E-008  | -3.72937254E-012 | 2 |         |          |          |   |
| 2.14211245E+004     | 3.08587767E+002  | 1.31176086E+000  | 2.15680413E-003  | -4.33902987E-006 | 3 |         |          |          |   |
| 3.55108897E-009     | -1.00740206E-012 | 6.98533618E+001  | 6.60865839E+000  |                  | 4 |         |          |          |   |
| <b>TS_abs</b>       | S                | 1O               | 5H               | 1                | G | 300.000 | 2500.000 | 1500.000 | 1 |
| 9.23383030E+002     | -1.83936636E+000 | 1.36733226E-003  | -4.47534479E-007 | 5.44602023E-011  | 2 |         |          |          |   |
| -3.72375242E+005    | -5.04349677E+003 | 5.16461620E+000  | -8.09374819E-003 | 2.08285083E-005  | 3 |         |          |          |   |
| -2.01957457E-008    | 6.66815816E-012  | -8.17617183E+003 | 1.96097575E+001  |                  | 4 |         |          |          |   |
| <b>post_complex</b> | S                | 1O               | 5H               | 1                | G | 300.000 | 2500.000 | 1500.000 | 1 |
| -1.07463498E+002    | 2.17183010E-001  | -1.52316011E-004 | 4.56431546E-008  | -4.91647256E-012 | 2 |         |          |          |   |
| 3.17262491E+004     | 6.40074741E+002  | 2.93138928E+000  | 8.96400425E-003  | -1.66976089E-005 | 3 |         |          |          |   |
| 1.27897972E-008     | -3.37950936E-012 | -1.28977367E+004 | 2.75358825E+001  |                  | 4 |         |          |          |   |

Species

Potential energy surfaces for the internal rotations

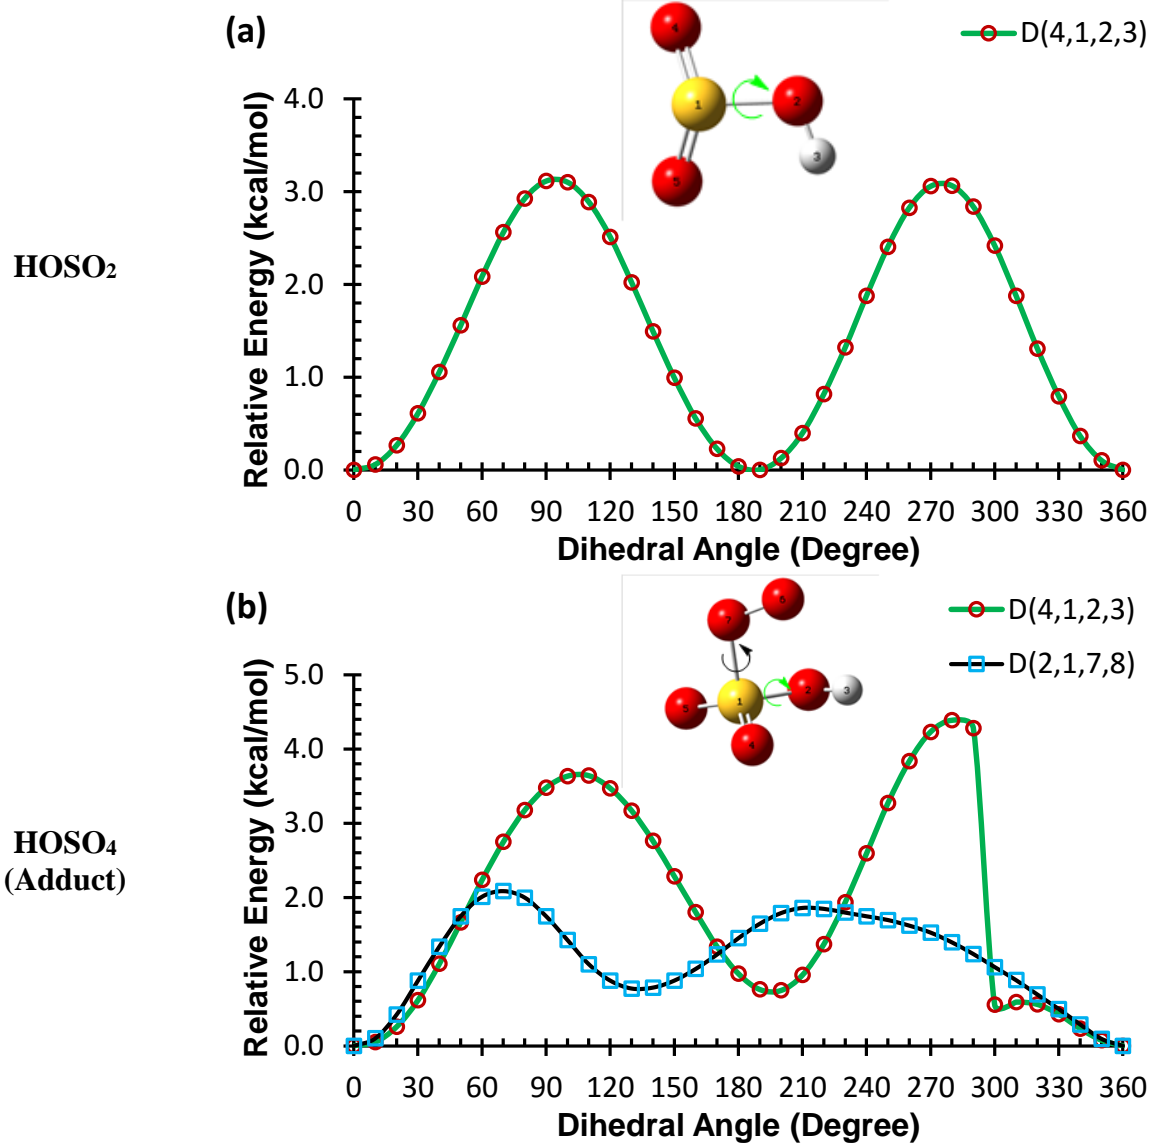

Species

Potential energy surfaces for the internal rotations

TS1

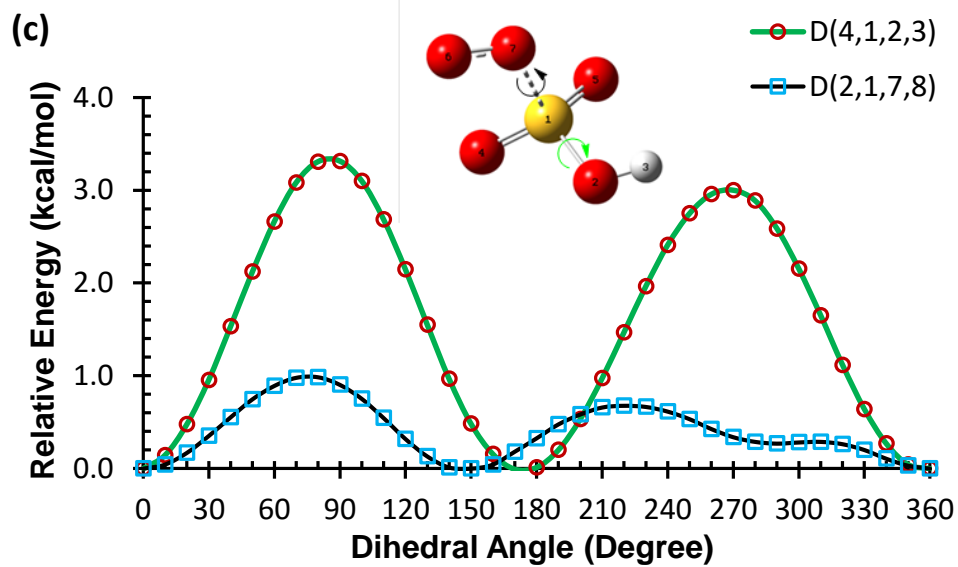

TS\_abs

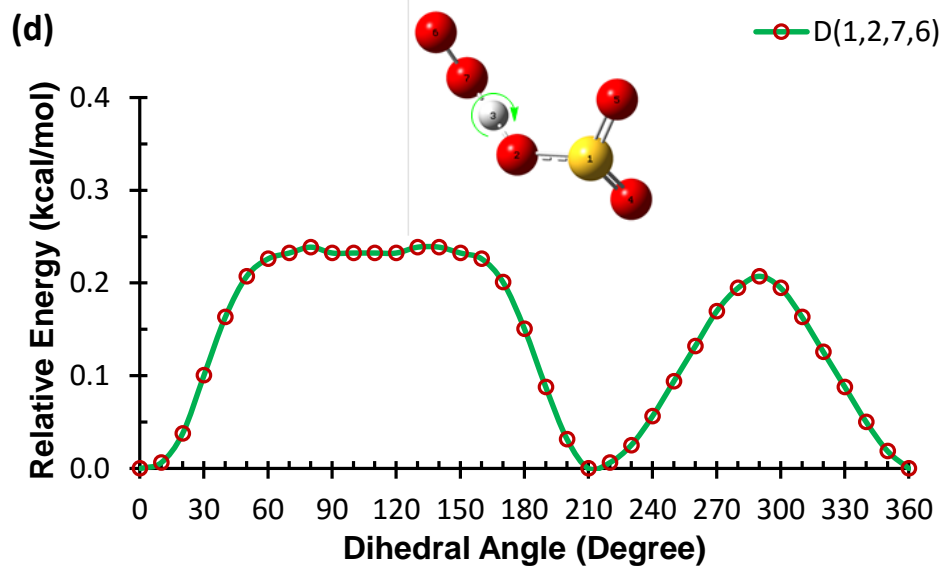

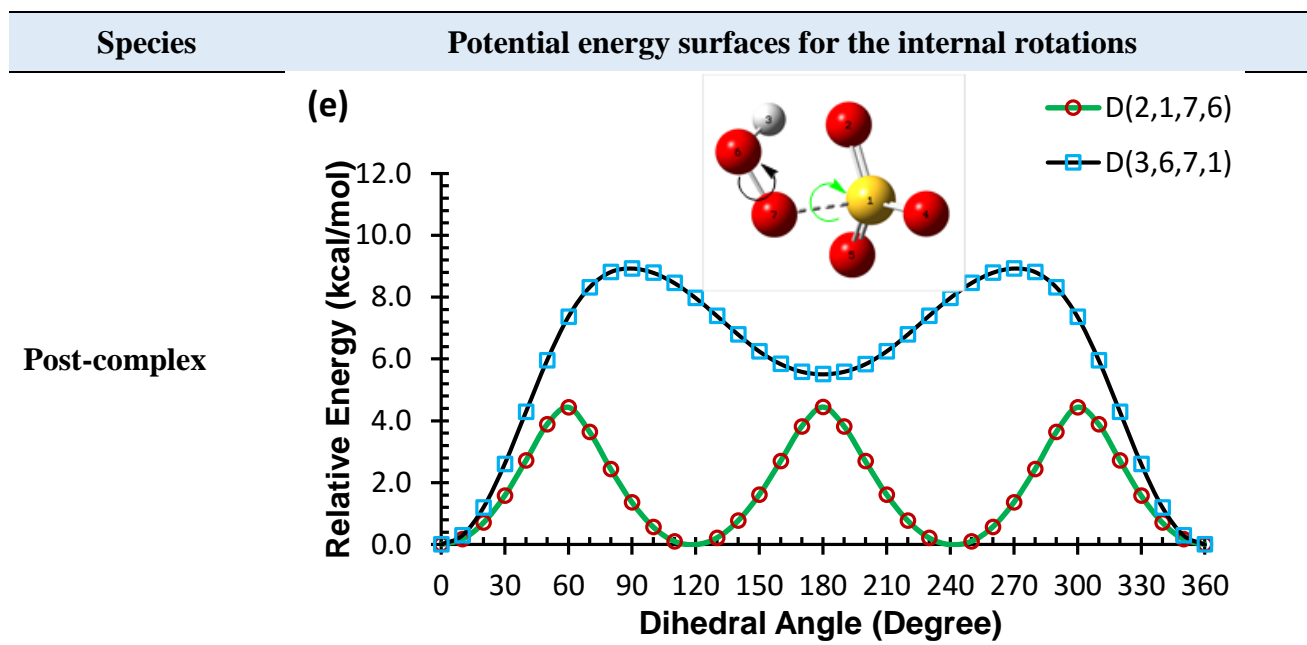

**Figure S1:** Hindrance potentials for HOSO<sub>2</sub> (a), HOSO<sub>4</sub> (b), TS1 (c), TS\_abs (d) and Post-complex (e) calculated at B3LYP/aug-cc-pVDZ level of theory.

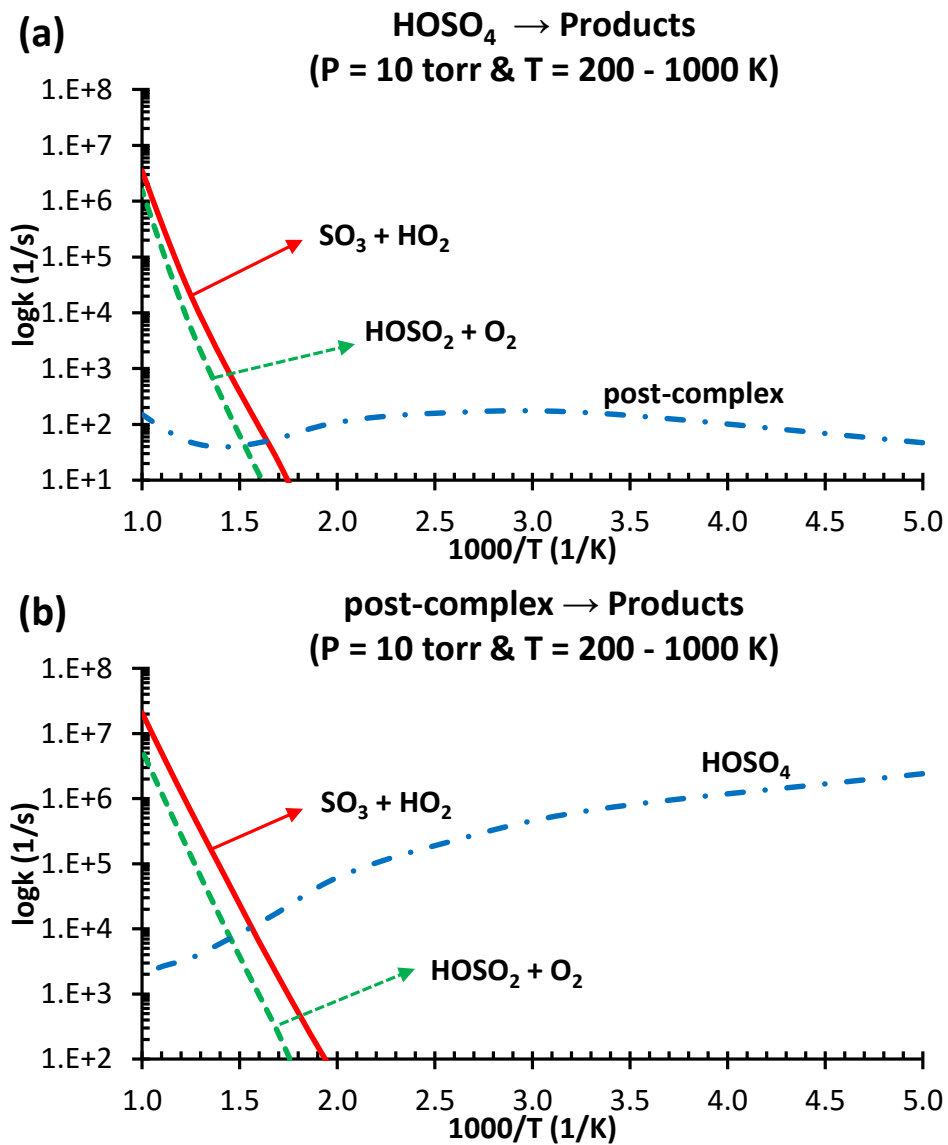

**Figure S2:** Calculated rate constants as a function of temperature at P = 10 torr for the HOSO<sub>4</sub> → products (a) and post-complex → products (b) reactions.

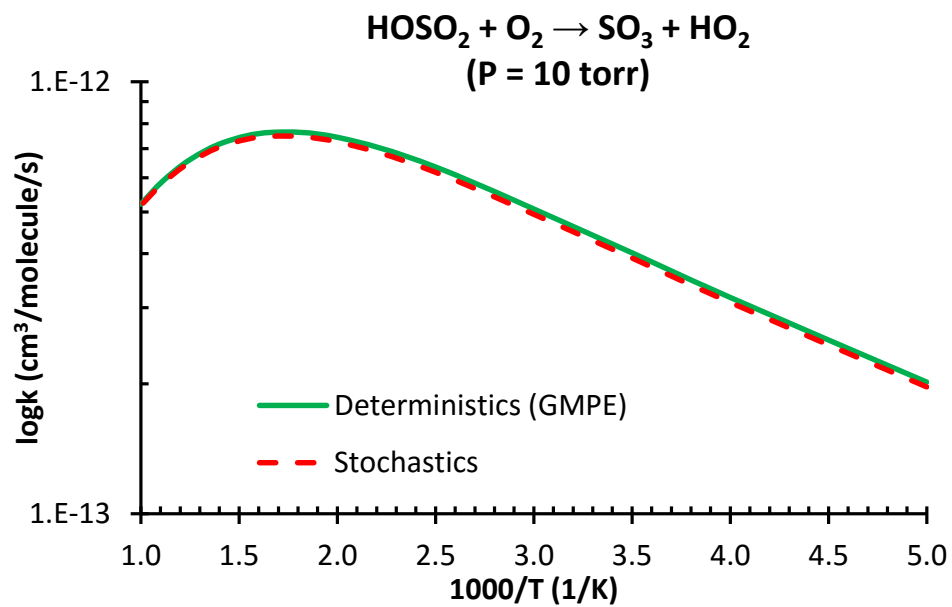

**Figure S3:** Comparison of the calculated rate constants between the deterministic (solid line) and stochastic (dashed line) models as a function of temperature ( $T = 200 - 1000$  K) at  $P = 10$  torr for the  $\text{HOSO}_2 + \text{O}_2 \rightarrow \text{SO}_3 + \text{HO}_2$  reaction.

## References

1. S. Nagase, S. Hashimoto and H. Akimoto, *J. Phys. Chem.*, 1988, **92**, 641-644.
2. S. Hashimoto, G. Ioué and H. Akimoto, *Chem. Phys. Lett.*, 1984, **107**, 198-202.
3. M. Wierzejewska and A. Olbert-Majkut, *J. Phys. Chem. A*, 2003, **107**, 10944-10952.
4. N. Gonzalez-Garcia and M. Olzmann, *Phys. Chem. Chem. Phys.*, 2010, **12**, 12290-12298.
5. H. Somnitz, *Phys. Chem. Chem. Phys.*, 2004, **6**, 3844.
6. N. González-García, W. Klopper and M. Olzmann, *Chem. Phys. Lett.*, 2009, **470**, 59-62.
7. W. Klopper, D. P. Tew, N. Gonzalez-Garcia and M. Olzmann, *J. Chem. Phys.*, 2008, **129**, 114308.
8. K. P. Huber and G. Herzberg, *Molecular Spectra and Molecular Structure. IV. Constants of Diatomic Molecules*, Van Nostrand Reinhold Co, 1979.
9. D. Majumdar, G.-S. Kim, J. Kim, K. S. Oh, J. Y. Lee, K. S. Kim, W. Y. Choi, S.-H. Lee, M.-H. Kang and B. J. Mhin, *J. Chem. Phys.*, 2000, **112**, 723-730.
10. T. Shimanouchi, *Tables of Molecular Vibrational Frequencies, Consolidated Volume 1, NSRDS NBS-39*.
11. M. E. Jacox, *J. Phys. Chem. Ref. Data*, 1994, **Monograph 3**
12. I. M. Alecu and D. G. Truhlar, *J. Phys. Chem. A*, 2011, **115**, 2811-2829.
13. T. J. Lee and P. R. Taylor, *Int. J. Quantum Chem.*, 1989, **36**, 199-207.
14. D. Jayatilaka and T. J. Lee, *J Chem Phys*, 1993, **98**, 9734-9747.
15. J. C. Rienstra-Kiracofe, W. D. Allen and H. F. Schaefer, *J. Phys. Chem. A*, 2000, **104**, 9823-9840.
16. M. A. Ali, J. A. Sonk and J. R. Barker, *J. Phys. Chem. A*, 2016, **120**, 7060-7070.
17. M. Monge-Palacios and H. Rafatijo, *Phys Chem Chem Phys*, 2017, **19**, 2175-2185.
